# Supplementary material for: The Presence of Mycotoxins in Human Amniotic Fluid
Source: MDPI journal article supplement (doi:10.3390/toxins13060409), 2021-06-09
Supplement: s1 [file s1]

# Supplementary Materials: The Presence of Mycotoxins in Human Amniotic Fluid

Karolina Gromadzka, Jakub Pankiewicz, Monika Beszterda, Magdalena Paczkowska, Beata Nowakowska and Rafał Kocyłowski

Table S1.

| nr | Nr PD | Test Results aCGH | OTA [ng/ml] | AFLs [ng/ml] |      |      |      | NIV [ng/ml] | DON [ng/ml] | ZEA [ng/ml] |
|----|-------|-------------------|-------------|--------------|------|------|------|-------------|-------------|-------------|
|    |       |                   |             | G1           | G2   | B2   | B1   |             |             |             |
| 1  | 2877  | correct           | 0.5         | nd           | nd   | nd   | nd   | nd          | nd          | nd          |
| 2  | 2879  | correct           | 0.2         | nd           | nd   | nd   | nd   | nd          | nd          | nd          |
| 3  | 2883  | incorrect         | 0.06        | nd           | nd   | <LOQ | nd   | nd          | nd          | nd          |
| 4  | 2884  | correct           | 0.05        | nd           | nd   | nd   | nd   | nd          | nd          | nd          |
| 5  | 2885  | correct           | 0.06        | nd           | nd   | nd   | nd   | nd          | nd          | nd          |
| 6  | 2886  | correct           | 0.08        | nd           | nd   | nd   | nd   | nd          | nd          | nd          |
| 7  | 2887  | correct           | 0.2         | nd           | nd   | nd   | <LOQ | nd          | nd          | nd          |
| 8  | 2888  | incorrect         | 0.2         | nd           | 1.9  | nd   | nd   | 2823.40     | nd          | nd          |
| 9  | 2889  | incorrect         | 0.7         | nd           | nd   | nd   | nd   | nd          | nd          | nd          |
| 10 | 2890  | correct           | 0.3         | nd           | nd   | nd   | nd   | nd          | nd          | nd          |
| 11 | 2892  | correct           | nd          | nd           | nd   | nd   | nd   | nd          | nd          | nd          |
| 12 | 2893  | correct           | 0.1         | nd           | nd   | nd   | nd   | nd          | nd          | nd          |
| 13 | 2898  | correct           | 0.1         | nd           | nd   | nd   | nd   | nd          | nd          | nd          |
| 14 | 2902  | correct           | <LOQ        | 0.3          | nd   | nd   | nd   | nd          | nd          | nd          |
| 15 | 2904  | incorrect         | nd          | <LOQ         | <LOQ | nd   | nd   | nd          | nd          | nd          |
| 16 | 2906  | correct           | nd          | <LOQ         | <LOQ | nd   | nd   | nd          | nd          | nd          |
| 17 | 2907  | incorrect         | nd          | <LOQ         | nd   | nd   | nd   | nd          | nd          | nd          |
| 18 | 2909  | correct           | <LOQ        | nd           | nd   | nd   | nd   | nd          | nd          | nd          |
| 19 | 2910  | correct           | nd          | nd           | nd   | nd   | nd   | nd          | nd          | nd          |
| 20 | 2911  | correct           | nd          | nd           | nd   | nd   | nd   | 2099.20     | nd          | nd          |
| 21 | 2913  | correct           | <LOQ        | nd           | nd   | nd   | nd   | nd          | nd          | nd          |
| 22 | 2918  | incorrect         | nd          | nd           | nd   | nd   | nd   | 470         | nd          | nd          |
| 23 | 2920  | correct           | nd          | <LOQ         | <LOQ | <LOQ | nd   | nd          | nd          | nd          |
| 24 | 2921  | incorrect         | nd          | nd           | nd   | 0.4  | nd   | nd          | nd          | nd          |
| 25 | 2925  | correct           | nd          | nd           | nd   | nd   | nd   | nd          | nd          | nd          |

|    |      |           |      |      |      |      |    |         |         |    |
|----|------|-----------|------|------|------|------|----|---------|---------|----|
| 26 | 2928 | correct   | nd   | nd   | nd   | nd   | nd | nd      | nd      | nd |
| 27 | 2929 | correct   | nd   | nd   | nd   | nd   | nd | nd      | nd      | nd |
| 28 | 2930 | correct   | nd   | <LOQ | nd   | nd   | nd | nd      | nd      | nd |
| 29 | 2931 | incorrect | nd   | nd   | nd   | nd   | nd | nd      | nd      | nd |
| 30 | 2932 | correct   | nd   | nd   | nd   | nd   | nd | nd      | nd      | nd |
| 31 | 2933 | correct   | nd   | nd   | <LOQ | nd   | nd | nd      | nd      | nd |
| 32 | 2934 | correct   | <LOQ | nd   | nd   | nd   | nd | 3102.60 | nd      | nd |
| 33 | 2936 | correct   | nd   | nd   | nd   | <LOQ | nd | nd      | nd      | nd |
| 34 | 2937 | correct   | nd   | nd   | nd   | nd   | nd | nd      | nd      | nd |
| 35 | 2938 | correct   | nd   | nd   | nd   | nd   | nd | nd      | nd      | nd |
| 36 | 2939 | correct   | 0.02 | nd   | nd   | nd   | nd | nd      | nd      | nd |
| 37 | 2940 | correct   | nd   | nd   | <LOQ | nd   | nd | nd      | 2417.80 | nd |
| 38 | 2941 | correct   | nd   | <LOQ | <LOQ | <LOQ | nd | nd      | nd      | nd |
| 39 | 2943 | correct   | nd   | nd   | nd   | nd   | nd | nd      | nd      | nd |
| 40 | 2945 | incorrect | nd   | nd   | nd   | nd   | nd | nd      | nd      | nd |
| 41 | 2946 | correct   | nd   | nd   | nd   | nd   | nd | nd      | nd      | nd |
| 42 | 2947 | correct   | nd   | <LOQ | nd   | nd   | nd | nd      | nd      | nd |
| 43 | 2948 | correct   | nd   | nd   | nd   | nd   | nd | nd      | nd      | nd |
| 44 | 2949 | incorrect | nd   | 0.3  | nd   | nd   | nd | nd      | nd      | nd |
| 45 | 2950 | correct   | <LOQ | 0.2  | nd   | nd   | nd | nd      | nd      | nd |
| 46 | 2951 | correct   | nd   | nd   | <LOQ | nd   | nd | nd      | nd      | nd |
| 47 | 2953 | correct   | nd   | nd   | nd   | <LOQ | nd | nd      | 613.8   | nd |
| 48 | 2954 | correct   | nd   | 0.2  | nd   | nd   | nd | 470.2   | nd      | nd |
| 49 | 2955 | correct   | nd   | nd   | nd   | nd   | nd | nd      | nd      | nd |
| 50 | 2956 | correct   | nd   | nd   | nd   | nd   | nd | nd      | nd      | nd |
| 51 | 2959 | correct   | nd   | nd   | nd   | nd   | nd | nd      | nd      | nd |
| 52 | 2960 | correct   | nd   | nd   | nd   | nd   | nd | nd      | 312.6   | nd |
| 53 | 2961 | correct   | nd   | nd   | nd   | nd   | nd | nd      | nd      | nd |
| 54 | 2966 | correct   | <LOQ | nd   | <LOQ | nd   | nd | nd      | nd      | nd |
| 55 | 2994 | correct   | <LOQ | 0.4  | nd   | nd   | nd | nd      | nd      | nd |
| 56 | 2995 | correct   | nd   | nd   | nd   | nd   | nd | nd      | nd      | nd |
| 57 | 3002 | correct   | 0.03 | nd   | nd   | nd   | nd | 208     | 702.4   | nd |

|    |      |           |      |      |    |     |    |         |         |    |
|----|------|-----------|------|------|----|-----|----|---------|---------|----|
| 58 | 3012 | correct   | nd   | nd   | nd | nd  | nd | nd      | 439.5   | nd |
| 59 | 3016 | incorrect | nd   | nd   | nd | nd  | nd | 285.2   | 571.4   | nd |
| 60 | 3032 | incorrect | nd   | nd   | nd | nd  | nd | nd      | 1022.80 | nd |
| 61 | 3034 | correct   | nd   | nd   | nd | nd  | nd | 104.1   | 1034.30 | nd |
| 62 | 3052 | incorrect | nd   | nd   | nd | nd  | nd | 159     | 1094.60 | nd |
| 63 | 3073 | correct   | nd   | nd   | nd | nd  | nd | 232.8   | 2001.80 | nd |
| 64 | 3088 | correct   | nd   | nd   | nd | nd  | nd | 774.3   | nd      | nd |
| 65 | 3094 | correct   | nd   | 0.02 | nd | nd  | nd | 393.7   | 332.1   | nd |
| 66 | 3098 | correct   | nd   | nd   | nd | nd  | nd | 329.2   | 1924.80 | nd |
| 67 | 3110 | correct   | 0.05 | nd   | nd | nd  | nd | 136.9   | nd      | nd |
| 68 | 3113 | correct   | nd   | nd   | nd | 0.1 | nd | <LOQ    | 851.8   | nd |
| 69 | 3114 | correct   | nd   | nd   | nd | 0.2 | nd | nd      | nd      | nd |
| 70 | 3115 | correct   | nd   | 0.1  | nd | 0.2 | nd | 201.5   | 640     | nd |
| 71 | 3118 | correct   | nd   | nd   | nd | nd  | nd | 4037.60 | nd      | nd |
| 72 | 3121 | correct   | nd   | nd   | nd | nd  | nd | 835.2   | nd      | nd |
| 73 | 3123 | incorrect | nd   | nd   | nd | nd  | nd | nd      | nd      | nd |
| 74 | 3127 | correct   | nd   | nd   | nd | nd  | nd | nd      | nd      | nd |
| 75 | 3129 | correct   | nd   | nd   | nd | nd  | nd | 242.1   | 1553.60 | nd |
| 76 | 3190 | incorrect | nd   | nd   | nd | nd  | nd | nd      | nd      | nd |
| 77 | 3200 | correct   | nd   | nd   | nd | nd  | nd | 477.8   | 684.3   | nd |
| 78 | 3204 | correct   | nd   | nd   | nd | nd  | nd | 336.9   | nd      | nd |
| 79 | 3205 | correct   | nd   | nd   | nd | nd  | nd | 229.9   | <LOQ    | nd |
| 80 | 3206 | correct   | nd   | nd   | nd | nd  | nd | 639.7   | 490.3   | nd |
| 81 | 3218 | correct   | nd   | nd   | nd | nd  | nd | 652.4   | 523.8   | nd |
| 82 | 3219 | correct   | nd   | nd   | nd | nd  | nd | 1329.00 | 1592.80 | nd |
| 83 | 3223 | correct   | nd   | nd   | nd | nd  | nd | 645.7   | 498.8   | nd |
| 84 | 3227 | correct   | nd   | 0.1  | nd | nd  | nd | 117.72  | 993.6   | nd |
| 85 | 3244 | correct   | nd   | nd   | nd | nd  | nd | 572.7   | 729.1   | nd |
| 86 | 3247 | correct   | 0.03 | nd   | nd | nd  | nd | 144.2   | 544     | nd |
